# Supplementary material for: Bentonite-titanium dioxide functional nanocomposites suitable for wastewater treatment: an integrated photocatalyst-adsorbent system
Source: Royal Society of Chemistry journal article supplement (doi:10.1039/d1nj05472d), 2022-01-01
Supplement: d1nj05472d1.pdf [file d1nj05472d1.pdf]

## Supplementary Information

### Bentonite-titanium dioxide functional nanocomposite suitable for wastewater treatment; An integrated photocatalyst-adsorbent system

Venu Sreekala Smitha,\*Vayalveetil Athira, Kazhuthuttil Kochu Jayasooryan, Thoppil Ramakrishnan Resmi, and Puthenveedu Sadasivan Pillai Harikumar

*Centre for Water Resources Development and Management, Kunnamangalam P.O., Calicut-673571, Kerala, India*

FTIR spectra confirming the presence of titanium dioxide in the bentonite-titania nanocomposite is presented in Fig. S1.

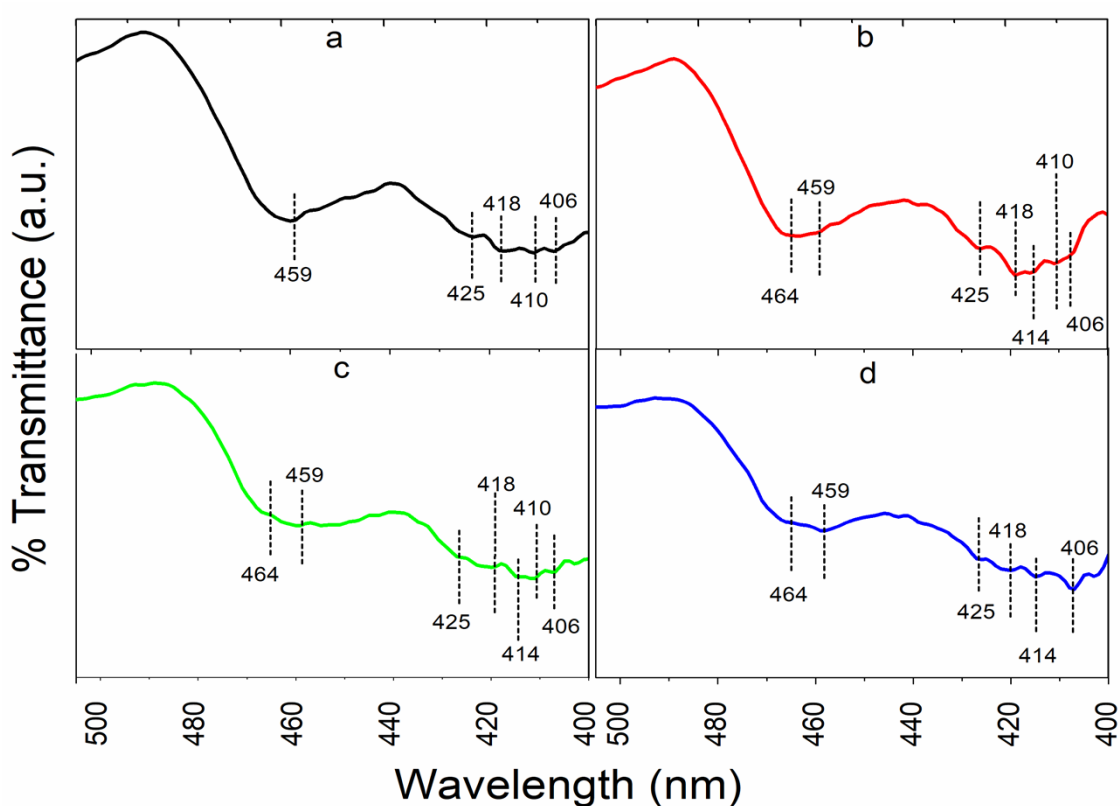

Fig. S1. FTIR spectra of (a) pure bentonite (b) BT-0.25 (c) BT-0.5 and (d) BT-1, all calcined at 500 °C.

Table S1 presents the respective weight losses from thermogravimetric analysis at different temperature ranges for the prepared samples.

Table S1. Weight loss pattern from thermo-gravimetric analysis for pure bentonite, pure titania and for bentonite-titania nanocomposites.

| Sample         | Number of steps | Weight loss (%) | Weight loss (%) |            |            |            |            |
|----------------|-----------------|-----------------|-----------------|------------|------------|------------|------------|
|                |                 |                 | Step1           | Step 2     | Step 3     | Step 4     | Step 5     |
| Pure bentonite | four            | 15.1            | 50-100 °C       | 100-450 °C | 450-525 °C | 525-950 °C | Nil        |
|                |                 |                 | 0.4             | 8.1        | 4.5        | 2.1        |            |
| BT-0.25        | three           | 24.1            | 50-100 °C       | 100-525 °C | 525-950 °C | Nil        | Nil        |
|                |                 |                 | 5.3             | 12.7       | 6.1        |            |            |
| BT-0.5         | three           | 27.0            | 50-100 °C       | 100-525 °C | 525-950 °C | Nil        | Nil        |
|                |                 |                 | 6.3             | 14.3       | 6.4        |            |            |
| BT-1           | three           | 34.5            | 50-100 °C       | 100-525 °C | 525-950 °C | Nil        | Nil        |
|                |                 |                 | 9.5             | 18.8       | 6.2        |            |            |
| BTc-0.5        | three           | 15.1            | 50-100 °C       | 100-525 °C | 525-950 °C | Nil        | Nil        |
|                |                 |                 | 1.3             | 8.0        | 5.8        |            |            |
| Pure titania   | five            | 32.9            | 50-100 °C       | 100-225 °C | 225-275 °C | 275-425 °C | 425-950 °C |
|                |                 |                 | 8.7             | 4.1        | 15.9       | 3.9        | 0.3        |

Heavy metal concentration of the industrial waste water sample collected from an electroplating industry as measured by an ICP-OES instrument is given below in Table S2.

Table S2. Heavy metal concentration in the industrial waste water sample.

| Heavy metal | Concentration (ppm) |
|-------------|---------------------|
| Fe          | 2691.1              |
| Zn          | 933.4               |
| Cr          | 88.7                |
| Mn          | 29.6                |
| Mg          | 51.9                |

#### Determination of CEC by Centrifuge Method

According to the reported procedure 5A2 of Soil Survey Laboratory Methods Manual Number42 [R1, R2], 5 g of bentonite sample was added to 33 ml of 1N sodium acetate and stirred for 5 minutes, followed by centrifugation. The supernatant solution was analyzed for K and Ca concentration using a Flame Photometer (Systronics, 128). This step was repeated

four times, so that exchange of all cations in bentonite for  $\text{Na}^+$  is ensured. The sample was then washed with ethanol 3-4 times so that the electrical conductivity of the supernatant liquid reached between 55 to 40  $\mu\text{S}/\text{cm}$ . The absorbed sodium in the sample was extracted using 1N ammonium acetate (three 30-mL portions) and the concentration of K, Ca and Na was determined by Flame photometry.

The CEC was calculated using the expression:

$$\text{CEC} = (\text{A}/\text{W}) * \text{dilution} * 10$$

where: CEC is the cation exchange capacity in meq/ 100 g of clay

A = Na concentration (meq/L) and, W = sample weight (g)

CEC was calculated taking in account the sum of all the cations analyzed, ie K, Ca and Na, instead of just Na concentration.
